# Supplementary material
Source: Research Square preprint supplement (doi:10.21203/rs.3.rs-9728440/v1)
Supplement: Supplementary file 1 [file e50dd7a2d444f92440eb2dc6.docx]

## Supplementary Material

**
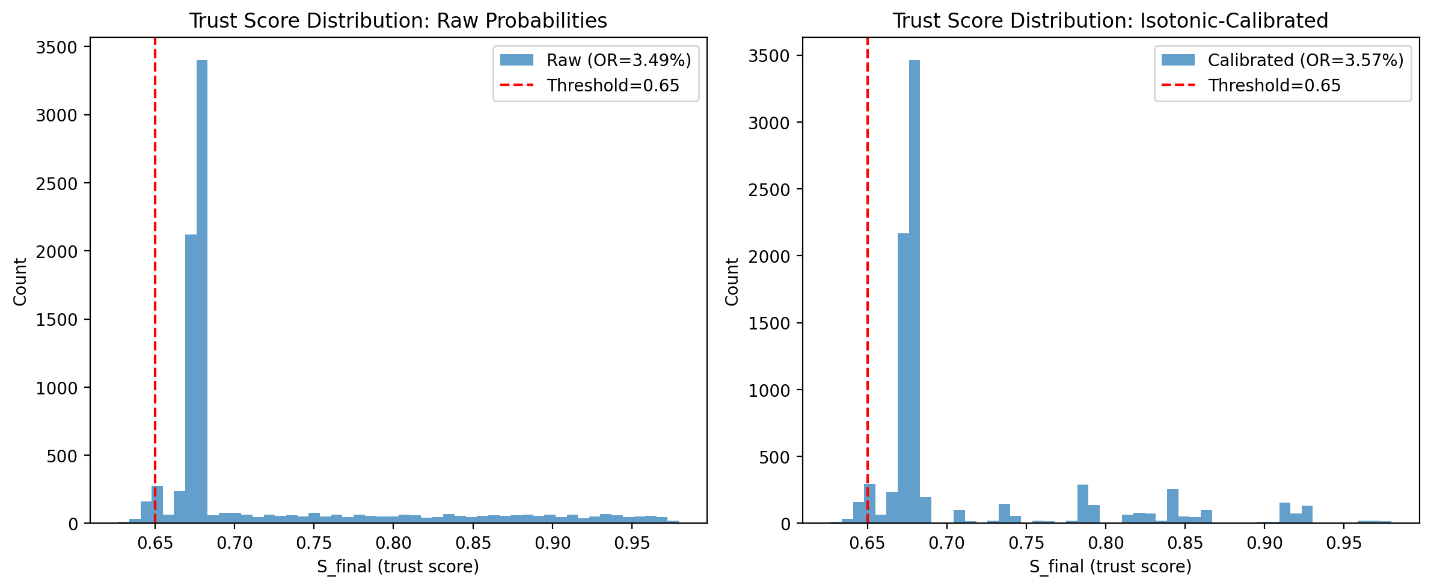
Figure S1 (trust score distribution: raw vs. calibrated):** Histogram comparing the distribution of composite trust scores (S_final) computed from raw (uncalibrated) probabilities vs. isotonic-calibrated probabilities for the Qwen3-Embedding-0.6B model at DMP level with logistic regression. The dashed red line indicates the moderate-transparency override threshold (θ = 0.65). Both distributions are nearly identical in central tendency (raw mean: 0.714 vs. calibrated mean: 0.710) and dispersion (raw std: 0.080 vs. calibrated std: 0.072), producing similar override rates (3.49% vs. 3.57%). The primary benefit of calibration is improved ECE (0.007 vs. 0.024), not altered override behavior.

**Table S2.** Systematic threshold calibration across models and data richness levels. Base threshold is the default transparency-conditioned value. Calibrated thresholds show values required to achieve target override rates (1%, 3%, 5%) at the DMP level using isotonic-calibrated LR probabilities.

| Model | Level | Base Threshold | Base OR (%) | Threshold for 1% OR | Threshold for 3% OR | Threshold for 5% OR |
| --- | --- | --- | --- | --- | --- | --- |
| Qwen3-Embedding-0.6B | D | 0.70 | 0.06 | 0.725 | 0.730 | 0.735 |
| Qwen3-Embedding-0.6B | DMP | 0.65 | 3.57 | 0.645 | 0.650 | 0.655 |
| Qwen3-Embedding-0.6B | ALL | 0.55 | 0.00 | 0.710 | 0.725 | 0.730 |
| Qwen2.5-3B | D | 0.70 | 0.00 | 0.755 | 0.760 | 0.760 |
| Qwen2.5-3B | DMP | 0.65 | 0.00 | 0.670 | 0.670 | 0.675 |
| Qwen2.5-3B | ALL | 0.55 | 0.00 | 0.735 | 0.740 | 0.740 |
| Qwen2.5-7B-4bit | D | 0.70 | 0.00 | 0.750 | 0.755 | 0.755 |
| Qwen2.5-7B-4bit | DMP | 0.65 | 0.00 | 0.665 | 0.670 | 0.670 |
| Qwen2.5-7B-4bit | ALL | 0.55 | 0.00 | 0.725 | 0.740 | 0.740 |

For models with 0% base override rate, the threshold must be raised above the base value to produce non-zero override rates. At the ALL level (high transparency, base threshold 0.55), thresholds must be raised substantially (to 0.71–0.74) to produce meaningful override rates because the high-transparency trust score distribution sits well above the default threshold. These calibrated thresholds demonstrate that model-specific adjustment is required for clinical deployment.
